# Supplementary material for: Benzothiazole derivatives containing different electron acceptors exhibiting totally different data-storage performances
Source: Royal Society of Chemistry journal article supplement (doi:10.1039/c3tc32008a), 2014-01-01
Supplement: c3tc32008a1.pdf [file c3tc32008a1.pdf]

## Supporting Information

### **Benzothiazole derivatives containing different electron acceptors exhibiting totally different data-storage performances**

Zhe Su, Hao Zhuang, Haifeng Liu, Hua Li\*, Qingfeng Xu, Jianmei Lu<sup>\*a,b</sup> and Lihua Wang<sup>b</sup>

<sup>1</sup>Key Laboratory of Organic Synthesis of Jiangsu Province, College of Chemistry, Chemical Engineering and Materials Science, Soochow University, 199 Ren'ai Road, Suzhou 215123, China

<sup>2</sup>Institute of Chemical Power Sources, Soochow University, Suzhou, Jiangsu 215006, China.

E-mail: [lujm@suda.edu.cn](mailto:lujm@suda.edu.cn)

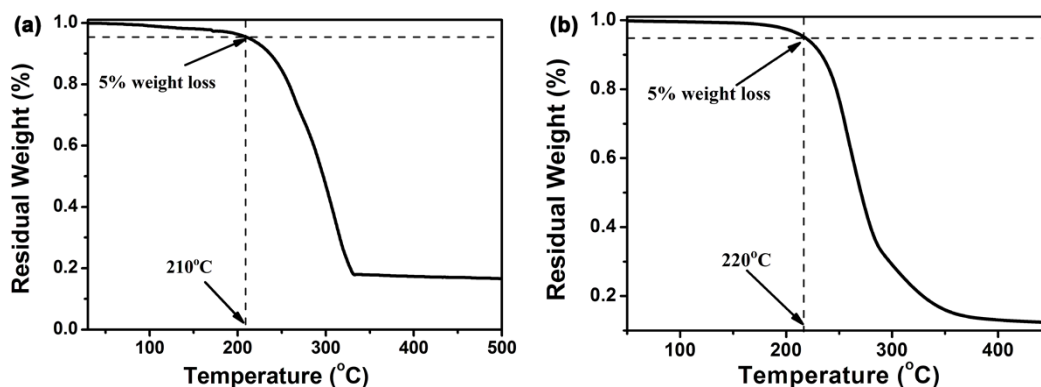

Fig. S1 TGA curve of BTVCz (a) and BTVCz-NO<sub>2</sub> (b) measured in nitrogen atmosphere at a heating rate of 10 °C/min

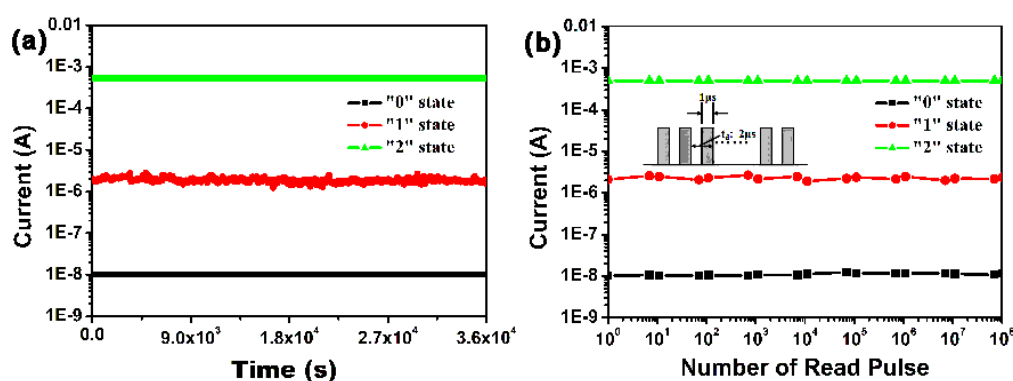

Fig. S2 (a) Stability of the device made from BTVCz-NO<sub>2</sub> films in three states under a constant “read” voltage of  $-1$  V; (b) Effect of read cycles on three states under a stress of voltage of  $-1$  V. The inset shows the pulse shapes in the measurement.

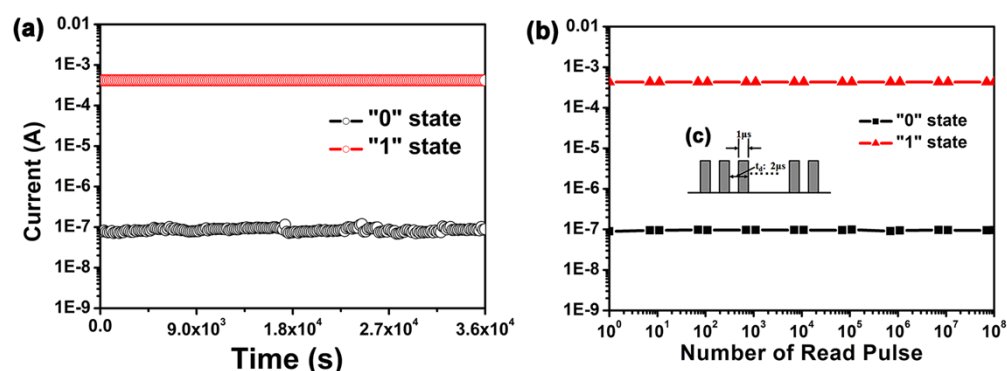

Fig. S3 (a) Stability of the device made from BTVCz films in three states under a constant “read” voltage of  $-1$  V; (b) Effect of read cycles on three states under a stress of voltage of  $-1$  V. The inset shows the pulse shapes in the measurement.

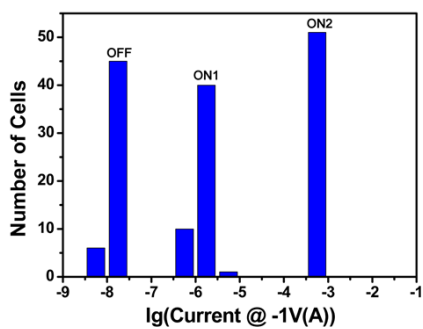

Fig. S4 Retention characteristics of molecule BTVCz-NO<sub>2</sub>.

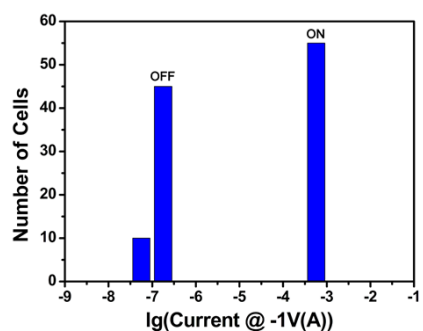

Fig. S5 Retention characteristics of molecule BTVCz.

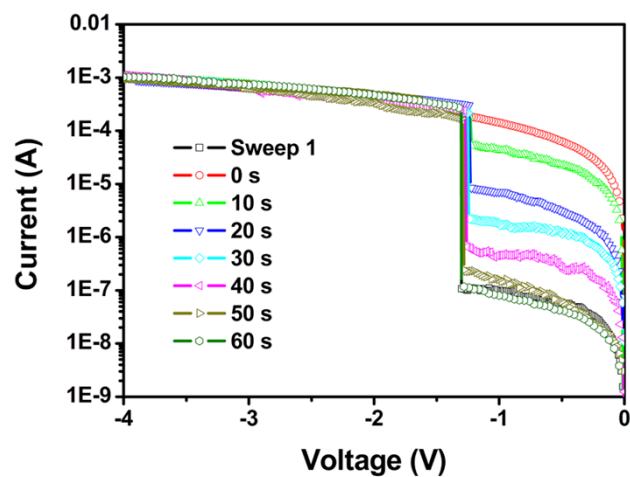

Fig. S6 I-V curves of BTVCz device at intervals of 0, 10, 20, 30, 40, 50 and 60 s.

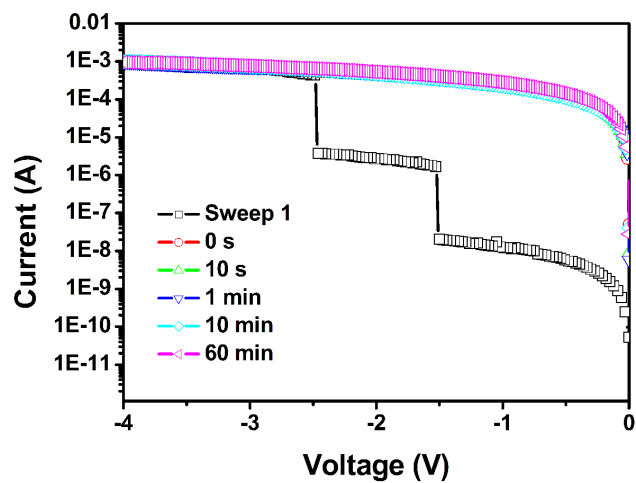

Fig. S7 I-V curves of BTVCz-NO<sub>2</sub> device at intervals of 0s, 10s, 1min, 10 min and 60

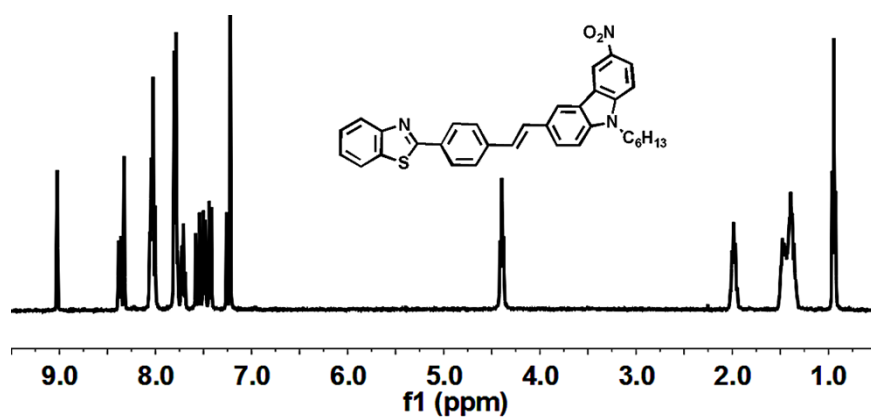

Fig. S8 <sup>1</sup>H NMR of molecule BTVCz-NO<sub>2</sub>.

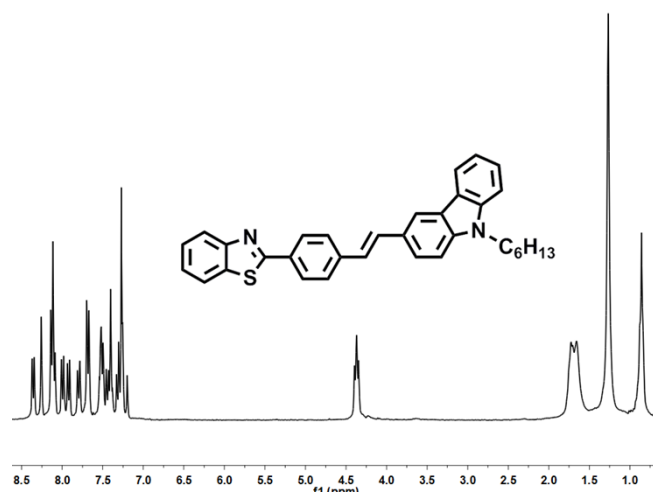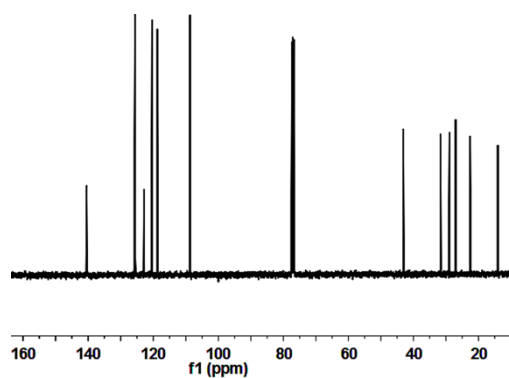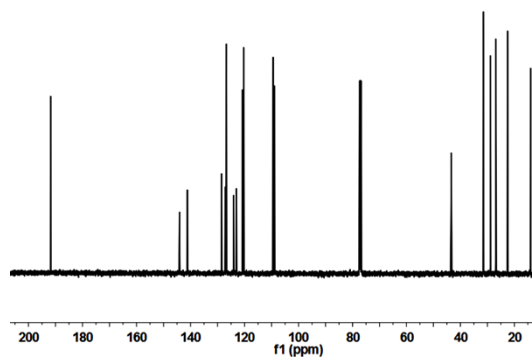

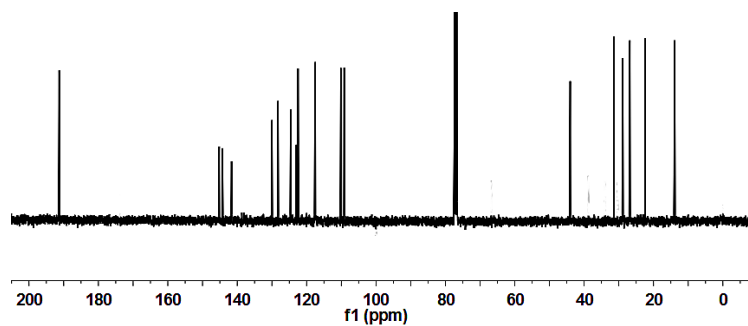

**Fig. S12**  $^{13}\text{C}$  NMR of molecule 9-hexyl-6-nitro-9H-carbazole-3-carbaldehyde

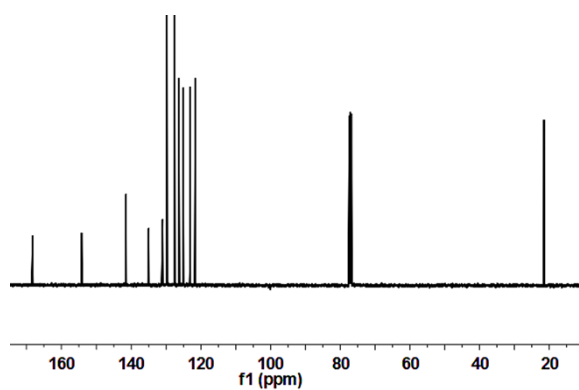

**Fig. S13**  $^{13}\text{C}$  NMR of molecule 2-p-tolylbenzo[d]thiazole

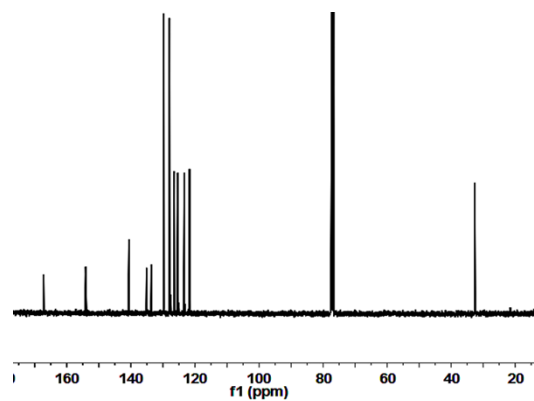

**Fig. S14**  $^{13}\text{C}$  NMR of molecule 2-(4-(bromomethyl)phenyl)benzo[d]thiazole

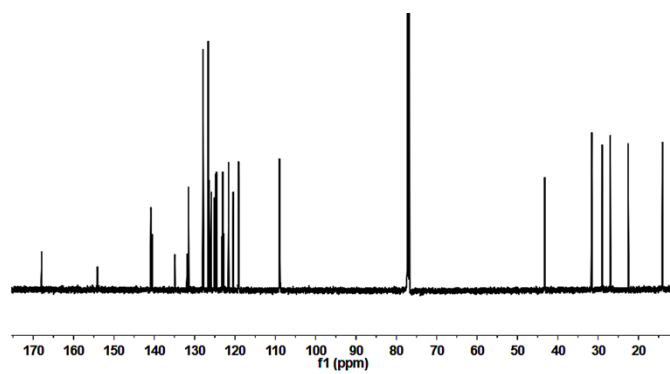

Fig. S15  $^{13}\text{C}$  NMR of molecule BTVCz.

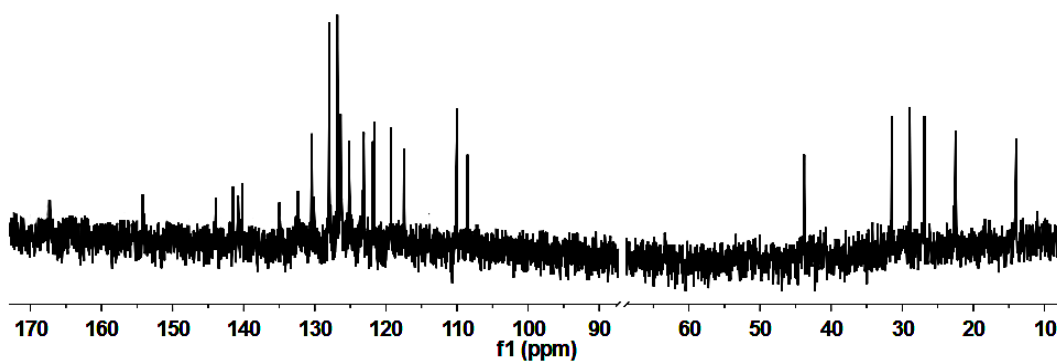

Fig. S16  $^{13}\text{C}$  NMR of molecule BTVCz.

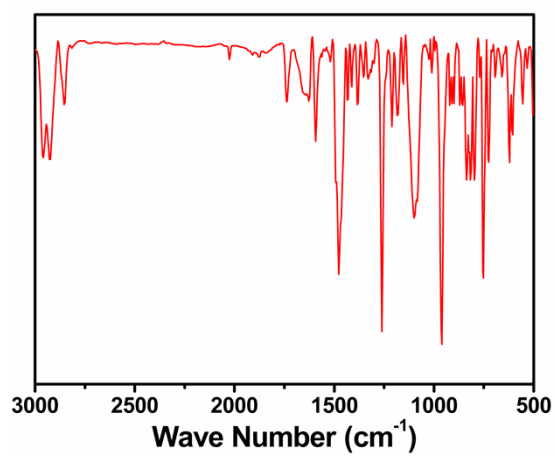

Fig. S17 Infrared spectrum of molecule BTVCz.

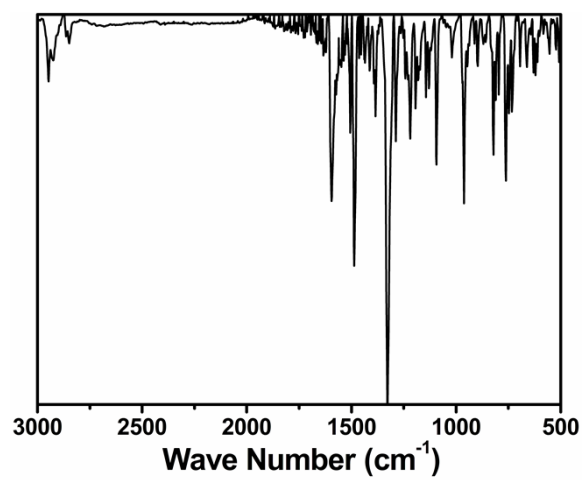

**Fig. S18** Infrared spectrum of molecule **BTVCz-NO<sub>2</sub>**
